# Supplementary material for: League of Brazilian Bioinformatics: a competition framework to promote scientific training
Source: bioRxiv or medRxiv preprint supplement (doi:10.1101/2020.12.17.423357), 2020-12-20
Supplement: Supplementary file [file media-2.pdf]

## Supplementary Material

# League of Brazilian Bioinformatics: a competition framework to promote scientific training

Carvalho, L.M.; Coimbra, N.; Neves, M.; Fonseca, N.; Costa, M.A.; Horacio, E.; Riyuzo, R.; Aburjaile, F.F.; Nagamatsu, S.T.

**Table S1.** Values of a (discrimination) and b (difficulty) of the 2PL model of each knowledge area for the 60 questions in the first phase of the LBB.

| Knowledge Area | Question (Qi) | a           | b           |
|----------------|---------------|-------------|-------------|
| CS             | Q1            | 0.677184614 | 0.375594022 |
| CS             | Q2            | 0.595669378 | -0.2544022  |
| CS             | Q3            | 1.267648793 | -0.35025751 |
| CS             | Q4            | 0.150213833 | 0.497767792 |
| CS             | Q5            | 0.272514146 | 1.691122277 |
| CS             | Q6            | 0.77492097  | -2.96670947 |
| CS             | Q7            | 0.6710295   | -2.39132228 |
| CS             | Q8            | 0.378753189 | -3.1230163  |
| CS             | Q9            | 0.788256406 | -0.85130745 |
| CS             | Q10           | 0.849993797 | -0.69126061 |

|    |     |              |             |
|----|-----|--------------|-------------|
| CS | Q11 | -0.248475874 | -5.55864787 |
| CS | Q12 | 2.215946279  | -0.79666983 |
| CS | Q13 | 0.923859688  | 0.683360721 |
| CS | Q14 | 0.160472304  | 2.835483322 |
| CS | Q15 | 0.772714504  | 1.389237722 |
| CS | Q16 | 3.341538465  | -1.21066181 |
| CS | Q17 | 2.094052667  | -1.05596877 |
| CS | Q18 | 1.534820666  | -0.73431154 |
| CS | Q19 | 0.667034087  | -1.86253556 |
| CS | Q20 | 2.806777303  | -0.92381105 |
| B  | Q21 | 0.068107356  | 11.43157047 |
| B  | Q22 | 0.606629371  | 0.409721461 |
| B  | Q23 | 0.828012131  | 2.363200184 |
| B  | Q24 | 0.544660247  | -1.18185507 |
| B  | Q25 | 0.557793044  | 0.582622738 |
| B  | Q26 | 0.387371707  | -0.38903123 |
| B  | Q27 | 0.630909939  | -1.32078153 |
| B  | Q28 | 0.494180906  | 3.409392409 |
| B  | Q29 | 0.51348152   | 1.266124635 |

|         |     |              |             |
|---------|-----|--------------|-------------|
| B       | Q30 | 0.723545627  | 0.243147962 |
| B       | Q31 | 1.015831514  | -0.41560245 |
| B       | Q32 | 1.047449654  | -2.56363653 |
| B       | Q33 | 1.706633895  | -1.6695737  |
| B       | Q34 | 0.793477913  | -3.19110215 |
| B       | Q35 | 0.428787816  | -1.88049401 |
| B       | Q36 | 0.825573677  | -1.84544957 |
| B       | Q37 | 0.471296434  | -4.59676435 |
| B       | Q38 | 0.908781745  | -2.38646555 |
| B       | Q39 | 1.338924916  | -3.11217277 |
| B       | Q40 | 0.490613358  | -2.67551154 |
| BioInfo | Q41 | 0.864003856  | -1.24198323 |
| BioInfo | Q42 | -0.184877153 | -9.52685142 |
| BioInfo | Q43 | 0.855765405  | 0.216642178 |
| BioInfo | Q44 | 1.670270262  | -0.2286126  |
| BioInfo | Q45 | 0.969547183  | 1.166217418 |
| BioInfo | Q46 | 0.219858468  | 0.343448598 |
| BioInfo | Q47 | 2.469140236  | -1.68054068 |
| BioInfo | Q48 | 0.863796224  | -0.17682688 |

|         |     |             |             |
|---------|-----|-------------|-------------|
| BioInfo | Q49 | 3.339488506 | -0.94045481 |
| BioInfo | Q50 | 0.602862149 | 0.013697615 |
| BioInfo | Q51 | 1.400070285 | 0.998039735 |
| BioInfo | Q52 | 0.329866431 | 0.467024694 |
| BioInfo | Q53 | 0.67605638  | -0.22453786 |
| BioInfo | Q54 | 0.835970161 | 0.220037391 |
| BioInfo | Q55 | 1.373215187 | -0.11766919 |
| BioInfo | Q56 | 1.182776545 | -1.51483846 |
| BioInfo | Q57 | 1.496766107 | -1.28644172 |
| BioInfo | Q58 | 1.00167053  | -1.32871098 |
| BioInfo | Q59 | 0.42158735  | 0.932015018 |
| BioInfo | Q60 | 0.451975647 | 4.368745145 |

Legend: CC: Computer Science; B: Biology; BioInfo: Bioinformatics

## EVALUATION FORM

### 1. Scientific Question

Criterion 1: The research challenges are perfectly formulated and placed against the state of the art and the existing literature.

|   |   |   |   |   |   |
|---|---|---|---|---|---|
| 0 | 1 | 2 | 3 | 4 | 5 |
|---|---|---|---|---|---|

Criterion 2: Original, bioethical, and internationally competitive research project.

|   |   |   |   |   |   |
|---|---|---|---|---|---|
| 0 | 1 | 2 | 3 | 4 | 5 |
|---|---|---|---|---|---|

Criterion 3: Innovative research project.

|   |   |   |   |   |   |
|---|---|---|---|---|---|
| 0 | 1 | 2 | 3 | 4 | 5 |
|---|---|---|---|---|---|

### 2. Choice of Methodology

Criterion 4: The methodology described is convincing.

|   |   |   |   |   |   |
|---|---|---|---|---|---|
| 0 | 1 | 2 | 3 | 4 | 5 |
|---|---|---|---|---|---|

Criterion 5: The research project can be carried out within the proposed deadline.

|   |   |   |   |   |   |
|---|---|---|---|---|---|
| 0 | 1 | 2 | 3 | 4 | 5 |
|---|---|---|---|---|---|

Criterion 6: The research project is reproducible.

|   |   |   |   |   |   |
|---|---|---|---|---|---|
| 0 | 1 | 2 | 3 | 4 | 5 |
|---|---|---|---|---|---|

Criterion 7: The project is feasible according to the budget.

|   |   |   |   |   |   |
|---|---|---|---|---|---|
| 0 | 1 | 2 | 3 | 4 | 5 |
|---|---|---|---|---|---|

### 3. Discussion and Results

Criterion 8: The results have a great possibility of significantly expanding the frontier of knowledge in the area and, therefore, of having a very relevant scientific impact.

|   |   |   |   |   |   |
|---|---|---|---|---|---|
| 0 | 1 | 2 | 3 | 4 | 5 |
|---|---|---|---|---|---|

Criterion 9: The results have a positive social return and environmental impact.

|   |   |   |   |   |   |
|---|---|---|---|---|---|
| 0 | 1 | 2 | 3 | 4 | 5 |
|---|---|---|---|---|---|

Criterion 10: There is the creation/support of new collaboration networks, infrastructure, dissemination of results, and among others.

|   |   |   |   |   |   |
|---|---|---|---|---|---|
| 0 | 1 | 2 | 3 | 4 | 5 |
|---|---|---|---|---|---|

### 4. Presentation

Criterion 11: Clean and creative presentation.

|   |   |   |   |   |   |
|---|---|---|---|---|---|
| 0 | 1 | 2 | 3 | 4 | 5 |
|---|---|---|---|---|---|

Criterion 12: Oral presentation of the team.

|   |   |   |   |   |   |
|---|---|---|---|---|---|
| 0 | 1 | 2 | 3 | 4 | 5 |
|---|---|---|---|---|---|

Criterion 13: The writing of the document.

|   |   |   |   |   |   |
|---|---|---|---|---|---|
| 0 | 1 | 2 | 3 | 4 | 5 |
|---|---|---|---|---|---|

## 5. Bonus

Bonus Criterion: The team presented relevant topics beyond the expected.

What was the Bonus? Bonus score of 1-5

Bonus 1:

---
